1 **Large-scale identification of protein histidine methylation in human cells**

2

3 **Sebastian Kapell<sup>1</sup> and Magnus E. Jakobsson<sup>2,\*</sup>**

4

5 <sup>1</sup>National Bioinformatics Infrastructure Sweden (NBIS), Science for Life Laboratory, Department of  
6 Biochemistry and Biophysics, Stockholm University, 10691, Stockholm, Sweden

7 <sup>2</sup>Department of Immunotechnology, Lund University, Medicon Village, Lund, Sweden.

8

9 \*To whom correspondence may be addressed: Magnus E. Jakobsson,

10 magnus.jakobsson@immun.lth.se; Tel.: (+46) 735 254700.

11 **ABSTRACT**

12 Methylation can occur on histidine, lysine and arginine residues in proteins and often serves a regulatory  
13 function. Histidine methylation has recently attracted notable attention through the discovery of the  
14 human histidine methyltransferase enzymes SETD3 and METTL9. There are currently no methods to  
15 enrich histidine methylated peptides for mass spectrometry analysis and large-scale analyses of the  
16 modification are hitherto absent. In the present study we query ultra-comprehensive proteomic datasets  
17 to generate a resource of histidine methylation sites in human cells. We use this resource to explore the  
18 frequency, localization, targeted domains, protein types and sequence requirements of histidine  
19 methylation and benchmark all analyses to methylation events on lysine and arginine. Our results  
20 demonstrate that histidine methylation is widespread in human cells and tissues and that the  
21 modification is over-represented in regions of mono-spaced histidine repeats. We also report  
22 colocalization of the modification with functionally important phosphorylation sites and disease  
23 associated mutations to identify regions of likely regulatory and functional importance.

24 Taken together, we here report a system level analysis of human histidine methylation and our results  
25 represent a comprehensive resource enabling targeted studies of individual histidine methylation  
26 events.

## 27 INTRODUCTION

28 Methylation of histidine is a post translational modification (**PTM**) that was first described to occur on  
29 actin(1) and myosin(2) proteins around five decades ago. It can occur at two distinct positions denoted  
30 as 1-methyl histidine (**1MeH**) and 3-methyl histidine (**3MeH**) (here collectively referred to as **Hme**)(3).  
31 Despite being known to the scientific community for long it has gained far less attention than the well-  
32 studied protein methylation events on lysine and arginine(3), which are considered as key epigenetic  
33 modifications linked to chromatin compaction state and gene activity(4).

34 Until recently, little was known about the enzymology and significance of Hme. In 2018, SETD3 was  
35 uncovered as the first human methyltransferase enzyme targeting histidine and being responsible for  
36 the well-established methylation of Actin-H73(5). This finding were shortly thereafter independently  
37 validated and functionally shown to modulate smooth muscle contractility(6). In addition, the human  
38 METTL18 (also known as C1orf156) enzyme represents a clear homolog to the established yeast  
39 methyltransferase Hpm1 (systematic name YIL110W) targeting a RPL3-H243 in *S. cerevisiae*(7, 8), but  
40 its enzymatic activity remains to be validated. Finally, human METTL9 has been shown to act as an  
41 enzyme with broad specificity generating 1MeH in motifs composed of consecutive histidine residues  
42 spaced by small amino acids(9).

43 Aside from the few recent protein-centric studies focusing on individual Hme events, little is known about  
44 the abundance and function of the PTM. PTMs are most frequently studied at a large scale by affinity  
45 enrichment of modified peptides, or proteins, followed by mass spectrometry (**MS**)-based identification  
46 of targeted sites(10). Such approaches have been described for lysine methylation (**Kme**)(11, 12) and  
47 are well-established for arginine methylation (**Rme**)(13). For many PTMs, including Hme, there are no  
48 established affinity reagents, creating a need for innovative approaches for characterization. In such  
49 cases, querying ultra-comprehensive proteomic datasets for mass shifts corresponding to distinct  
50 modification events has recently emerged as a promising alternative(14).

51 Studies dedicated to global characterization of Hme are until this date absent. To explore the PTM we  
52 here mined a panel of ultra-deep human proteome datasets(15) to generate an extensive resource of  
53 Hme sites. The analysis revealed that Hme is widespread in human cells, and uncovers its abundance,  
54 context, and function in relation to Kme and Rme. To the best of our knowledge, the present study  
55 represents the first system level analysis of Hme and is to date the most comprehensive draft of the  
56 human histidine methylome.

57

## 58 **MATERIALS AND METHOD**

### 59 **Querying proteomic data for methylation events**

60 Publicly available comprehensive proteomic datasets (ProteomeXchange id: PXD004452) previously  
61 published by Bekker-Jensen *et al*(15) were downloaded from ProteomeXchange(16). The datasets were  
62 chosen based on exhaustive proteome depth, obtained through extensive off-line peptide fractionation  
63 using reverse phase chromatography at alkaline pH and analysis of individual fractions using fast  
64 scanning MS methods with a Q-Exactive HF mass spectrometer(15). The analyzed data corresponds  
65 to LC-MS/MS analysis of tryptic peptides from human tissue biopsies from colon, liver and prostate as  
66 well as the human cell lines A549, HCT116, HEK293, HeLa, MCF7 and SY5Y. In addition, an in-depth  
67 analysis of data derived from HeLa cell sample digested with a panel comprised of complementary  
68 proteases including trypsin, chymotrypsin, Glu-C and Lys-C was included to achieve comprehensive  
69 proteomic coverage.

70 All raw MS files were searched using MaxQuant(17) (version 1.6.0.17i) against a database containing  
71 the canonical isoforms of human proteins (Uniprot Complete proteome:  
72 UP\_2017\_04/Human/UP000005640\_9606.fasta) using the default software settings with few  
73 exceptions. To reduce the search space, the number of allowed missed cleavages was restricted to  
74 one. In addition to the default variable modifications, corresponding to acetylation of protein N-termini  
75 and oxidation of methionine, mono-methylation of lysine and arginine, di-methylation of lysine and  
76 arginine, tri-methylation of lysine as well as the custom generated modification mono-methylation of  
77 histidine were included as variable modifications.

### 78 **Bioinformatic analyses**

79 Bioinformatic analysis was performed using the Python programming language: Python Language  
80 Reference (version 3.8), available at <http://www.python.org>. The MaxQuant output files were processed,

81 removing annotated contaminants. Modifications identified in one or more biological replicates  
82 containing a mono-, di- or trimethylated modification at an arginine, lysine or histidine were defined as  
83 a unique methylation site. If a methylated peptide matched to multiple protein entries, all proteins were  
84 categorized as methylated in the downstream analysis. To benchmark our identified sites, the publicly  
85 available resource PhosphoSitePlus (version 6.5.9.3)(18) was used as a reference. Protein localization  
86 data was derived from the SubCellularBarcode project(19) and the subcellular localization of proteins in  
87 the cell line MCF7 was chosen as surrogate dataset in order to infer localization of our identified  
88 methylated proteins. Complete predicted subcellular localization of all methylated proteins was also  
89 done using the computational algorithm BUSCA(20), allowing for protein assignment into 9 distinct  
90 subcellular compartments. Identification of methylations colocalizing with phosphorylation sites were  
91 achieved by searching curated phosphoproteomic dataset(21) for known phosphorylations at a distance  
92 of 10 amino acids, and the functional score of sites was defined as described in original publication.  
93 Annotated protein domains were accessed using the resource portal InterPro (version 82.0)(22) and  
94 individual methylation sites was mapped to the interior regions of protein domains annotated in the Pfam  
95 database (version 33.1)(23). Functional enrichment analysis was conducted using the String database  
96 (version 11.0)(24) and multiple testing was corrected for with the Bonferroni method for false discovery  
97 rate (FDR). Logo and enrichment analysis of amino acids flanking methylation sites were performed  
98 using the iceLogo server and the human precompiled Swiss-Prot peptide sequence composition as  
99 reference(25).

## 100 **Proteomic characterization of METTL9 knockout cells**

101 A HAP-1 METTL9 knockout (product number HZGHC004343c010, Horizon Genomics) and a wild type  
102 control cell line (product number C631, Horizon Genomics) were propagated and maintained in IMDM  
103 Glutamax media (Thermo Fisher Scientific) supplemented with 10% fetal bovine serum (Thermo Fisher  
104 Scientific), as well as 100 U/ml penicillin and 100 U/ml streptomycin. The cells were lysed in a guanidine

105 hydrochloride-based buffer and peptides were prepared for analysis using a Q Exactive HF mass  
106 spectrometer(26) as previously described(27).

107 The LC-MS analysis was performed using an EASY-nLC 1200 HPLC system (Thermo Fisher Scientific)  
108 coupled to a Q Exactive HF orbitrap instrument. For each single shot proteome analysis, 500 ng peptide  
109 was separated using a 3 h chromatography gradient linearly ramped from 10% to 30% buffer B (80%  
110 acetonitrile in 0.1% formic acid) in buffer A (0.1% formic acid) during 170 minutes, whereafter the  
111 gradient was steeply ramped to 45% buffer B during 10 minutes, before column washing and  
112 equilibration. The mass spectrometer was set to continuously sample peptides through a Top12-based  
113 data dependent acquisition method. Target values for the full scan mass spectra were set to 3e6 charges  
114 in the m/z range 375-1500 and a maximum injection time of 25 ms and a resolution of 60,000 at a m/z  
115 of 200. Fragmentation of peptides was performed using higher energy C-trap dissociation (HCD) at a  
116 normalized collision energy of 28 eV. Fragment scans were performed at a resolution of 15,000 at a m/z  
117 200 with a AGC target value of 1e5 and a maximum injection time of 22 ms. To avoid repeated  
118 sequencing of peptides, a dynamic exclusion window was set to 30 s.

119 The raw MS files were analyzed using MaxQuant (version 1.6.0.17i) with identical settings to the  
120 exploratory searches of published proteomic datasets, statistical analyses was performed using  
121 Perseus(28). First, LFQ intensities were imported from the MaxQuant output file denoted “protein  
122 groups”. Common contaminants, proteins only identified as modified and proteins hitting the reverse  
123 decoy database were thereafter removed by filtering. The resulting data matrix was filtered for proteins  
124 detected in at least 70% of the replicates in one experimental condition. The data was then log-  
125 transformed and missing values were imputed from the lower tail of the abundance distribution using  
126 the default setting in Perseus(28). Proteins displaying significance differences between the conditions  
127 were identified through a Student’s T-test ( $p < 0.05$ ) with P-values corrected for multiple hypothesis  
128 testing using the Benjamini–Hochberg method. For cluster analysis, LFQ intensities for proteins

129 displaying a significant difference between the conditions were z-scored and row and columns trees  
130 were generated using Euclidean distance and Pearson correlation, respectively. Gene ontology analysis  
131 of proteins over- and under-represented in METTL9 knockout cells, was performed using the embedded  
132 function in Perseus and P-values were corrected using the Benjamini–Hochberg method.



## 133 RESULTS

134 Histidine methylation (**Figure 1**) is a poorly characterized PTM which has recently attracted notable  
135 attention through the discovery of the human histidine methyltransferase enzymes SETD3(5, 6) and  
136 METTL9(9). Large-scale Hme analysis is challenging since there are no available affinity agents to  
137 enrich peptides bearing the PTM for MS analysis. Here, we devise an alternative strategy based on  
138 mining ultra-deep human proteomic datasets(15) for the modification. This approach enables global  
139 identification of cellular Hme events and a subsequent system level analysis of the PTM.

140

### 141 Histidine methylation is widespread in human cells

142 To explore the abundance of Hme we searched ultra-comprehensive proteomic datasets derived from  
143 the commonly used human cell lines A549, HCT116, HEK293, HeLa, MCF7 and SY5Y as well as tissue  
144 biopsies from human colon, liver and prostate(15) (**Figure 2A**). The datasets were selected based on  
145 the expression of the recently established human HMT enzymes SETD3 and METTL9 (**Supplementary**  
146 **Figure S1**). The searches were performed using MaxQuant(17) with Hme defined as a custom PTM.  
147 To avoid misidentification of Hme sites, the isobaric PTMs mono-, di- and trimethylation of lysine (Kme1,  
148 Kme2 and Kme3; referred to as Kme) (**Supplementary Figure S2A**) as well as mono- and di-  
149 methylation of arginine (Rme1 and Rme2; referred to as Rme) (**Supplementary Figure S2B**) were  
150 defined as additional variable modifications (**Figure 2A**). This approach enables cellular Kme and Rme  
151 events to serve as a benchmark for the downstream Hme-centric analyses.

152 We anticipated that using a broad range of human cell proteome datasets would enable the identification  
153 of both general and cell specific Hme events. The exploratory searches revealed 267 and 80 Hme sites  
154 across the cell lines and tissue biopsies, respectively (**Figure 2B, Supplementary Table S1**). Moreover,  
155 we found several distinct Hme events in multiple cell lines and tissue biopsies (**Figure 2B**). This led us

156 to define a core histidine methylome based on sites identified in 50%, or more, of the cell lines and  
157 tissue biopsies (**Figure 2C**). The core methylome includes two sites present in several actin variants,  
158 and actin related proteins, corresponding to ACTA1-H103 and established SETD3-target site ACTB-  
159 H73(1, 5, 6) (**Figure 2C** and **Supplementary Figure S3A**). Moreover, the core methylome  
160 encompasses APEX1-H151 (Uniprot id P27695), CPT2-H369 (P23786), EXOS7-H275 (Q15024),  
161 NP1L4-H4 (Q99733) and RBM22-H183 (Q9NW64) (**Figure 2C**) and the Hme sites in these non-actin  
162 related proteins do not share apparent sequence homology (**Supplementary Figure S3B**).

163 A detailed inspection of tandem mass spectra for actin methylation revealed interesting features. First,  
164 fragment spectra were of high quality and unambiguously supported methylation of ACTB-H73, with  
165 high coverage of up- and down-stream b- and y-ions (**Figure 2D**). Tandem mass spectra from PTM  
166 bearing peptides can contain so-called immonium ions with a mass corresponding to the modified  
167 residue(29) and their identification may corroborate PTM events(30). Peptides containing unmodified  
168 histidine often yield a strong immonium ion with a mass of 110.0718 atomic mass units (**amu**) when  
169 fragmented(31). Strikingly, for the tryptic peptide covering ACTB-H73 we instead observed a clear peak  
170 at 124.0875 amu, corresponding to the mass of an Hme immonium ion (**Figure 2D**). Similarly, we  
171 detected an internal Hme site on the likely histidine methyltransferase METTL18 (METTL18-H154) and  
172 the corresponding fragment spectra also contained a clear Hme fingerprint immonium ion  
173 (**Supplementary Figure S4**). The observation of METTL18-H154 methylation is interesting as auto-  
174 methylation of methyltransferase enzymes is a well-established phenomenon, which has also previously  
175 been reported to occur with an amino acid specificity reflecting the enzymes physiological substrate(7).

176 In summary, the above analysis demonstrates that cellular Hme sites can be identified by querying  
177 comprehensive proteomic datasets and that the PTM is widespread in human cells and tissues.

178

## 179 **Exploring the HeLa methylome**

180 Intrigued by our observation that Hme is prevalent in human cells we embarked on an in-depth  
181 exploratory analysis of the PTM. For this analysis we focused on human HeLa cells, which is arguably  
182 the most used human cell line model in experimental research. We devised the now established  
183 successful approach of querying publicly available comprehensive datasets for Hme. This time, the  
184 chosen datasets(15) were specific for HeLa cells and generated using a panel of complementary  
185 proteases including, chymotrypsin, Glu-C and Lys-C, aside from trypsin, allowing for unprecedented  
186 proteome depth and coverage(32).

187 Across the different proteases, the analysis revealed support for 2526 distinct cellular methylation  
188 events at 2241 sites (**Figure 3B**). The number of methylation events exceed the number of sites since  
189 several individual arginine and lysine residues were detected with varying degrees of methylation  
190 (**Supplementary Table S1**). Roughly 12% of methylation events correspond to Hme (n=299) and the  
191 modification was less prevalent (n=299) than Kme (n=895) and Rme (n=1332) (**Figure 3B**). In line with  
192 these observations, a previous study has suggested that roughly 14% of protein methylation events  
193 occurs on histidine(33).

194 A comparative analysis of our HeLa methylome data to publicly available PTM resources(18) suggests  
195 that the bulk of (>80%) of Hme and Kme sites are not previously characterized (**Figure 3C**). The fraction  
196 of novel sites was notably lower for Rme (**Figure 3C**), which can be expected as established workflows  
197 for affinity enrichment and MS characterization of the PTM exist(13). The large number of identified new  
198 Hme sites highlights that the generated dataset is suitable for an exploratory systems level analysis of  
199 the PTM.

200 To investigate whether Hme is scattered across the proteome, or frequently occurring on individual  
201 proteins, we first analyzed the number of Hme events per Hme protein. This analysis revealed that a

202 single methylation event was identified for most (>80%) Hme proteins and that no proteins were  
203 identified with more than two Hme sites, and similar trends were observed for both Kme and Rme  
204 (**Figure 3D**). Next, we explored the abundance of identified methyl proteins. Interestingly, we found that  
205 Hme, Kme and Rme were all overrepresented on abundant proteins (**Figure 3E**) and envision two  
206 alternative explanations for this finding. First, the proteomics datasets in this study were generated using  
207 data dependent acquisition MS, an approach intrinsically biased to identify abundant peptides and  
208 PTMs(34). Alternatively, it has been suggested that certain methyltransferases have evolved specificity  
209 towards key abundant cellular proteins to modulate key cellular functions(35). Prominent examples  
210 include Kme and Rme in the core histone H3(36), the key translational elongation factor eEF1A(37, 38),  
211 and the molecular chaperone Hsp70(39–41) as well as Hme in actin(1, 5, 6), targets that were all  
212 identified and validated in this study (**Supplementary Table S1**).

213 Next, we investigated the subcellular localization of methyl proteins. To this end, we used both  
214 experimental data based on the SubCellBarCode resource(19) as well as the predicted localization  
215 based on the BUSCA approach(20). Both methods place Hme, Kme and Rme proteins in the cytoplasm,  
216 nucleus, mitochondria and in secretory compartments, at comparable frequencies (**Figure 3F** and  
217 **Supplementary Figure S5**), suggesting that Hme, Kme and Rme are all widespread across cellular  
218 structures.

219 In summary, the above indicates that Hme is prevalent and present in all major cellular compartments.

220

## 221 **Domains and motifs targeted by Hme**

222 Intrigued by the finding of Hme events across different cellular compartments, we next used the  
223 Pfam(23, 42) database to explore which proteins families and domains that are targeted. Although Hme,  
224 Kme and Rme proteins displayed similar subcellular localization profiles (**Figure 3F**) they are clearly

225 enriched in different Pfam entries (**Figure 4A**). Reassuringly, the most strongly enriched Pfam entries  
226 include to domains where the methylations are well established to exert important function including  
227 Actin for Hme(5, 6), RNA recognition for Rme(13) and core histone proteins for Kme(4) (**Figure 4A**).  
228 Notably, Hme was found overrepresented in Pfam entries associated with zinc binding properties (E3  
229 Ligase, CCCH- zinc finger; Zinc finger C2H2 type; Zinc finger CCCH type; Zinc finger C-x-C-x-C type  
230 (and similar); ZIP zinc transporter) (**Figure 4A** and **Supplementary Figure S6**).

231 Having established that Hme is over-represented in certain zinc binding proteins and domains, we next  
232 set out to analyze the sequence context flanking Hme sites using the iceLogo approach(25). We queried  
233 the 5 flanking amino acids for all detected Hme, Kme and Rme sites using the human precompiled  
234 Swiss-Prot peptide sequence composition as reference. This analysis revealed distinct sequence  
235 preferences for the different methylations (**Figure 4B-D**). Hme was overrepresented in mono-spaced  
236 repetitive histidine (H) sequences (**Figure 4B**), Rme in glycine (G) rich regions (**Figure 4C**), and Kme  
237 in the context of the acidic residues aspartate (D) and glutamate (E) (**Figure 4D**).

238 In summary, the above results demonstrate that Hme is over-represented in specific classes of zinc  
239 binding proteins and in the primary sequency context of consecutive mono-spaced histidine residues.

240

#### 241 **Co-occurrence of methylation with phosphorylation and disease associated mutations**

242 It has been reported that methylation events can cross-talk with other PTM types such as  
243 phosphorylation, constructing a regulatory circuit known as methyl-phospho switch(43). For example,  
244 the lysine methyltransferase SET7 have been shown to regulate the stability of DNA methyltransferase-  
245 1 (DNMT1)(44), a key enzyme in maintaining methylation patterns after DNA replication. DNMT1 is  
246 methylated at Lys142 and the adjacent Ser143 which can be phosphorylated by AKT1 kinase. These  
247 two PTMs are mutually exclusive and in absence of phosphorylation at Ser143, DNMT1 is methylated

248 at Lys142. The consequence of the methylation is an overall decrease in abundance of the key  
249 epigenetic regulator DNMT1. In order to pinpoint specific Hme events of high functional importance we  
250 integrated a highly curated phosphoproteomic dataset into our analysis(21). We searched for  
251 phosphorylations on serine, threonine or tyrosine within a distance of 10 amino acids from a methylation  
252 event and this analysis revealed 1999 co-localizing phosphorylation sites (**Supplemental Table S2**). A  
253 distinct advantage of the curated phosphoproteomic dataset was that it had been evaluated using a  
254 novel machine learning model that integrated multiple features relating to conservation and structural  
255 properties of the phosphorylation site, that are indicative of functional relevance, thus providing a  
256 functional score. This allowed us to evaluate our identified methylation events based on the functional  
257 score of the phosphorylation site in close proximity (**Figure 5A**). We found that Hme, in addition to Kme  
258 and Rme, co-localized with phosphorylation sites with an above median functional score (**Figure 5A**).

259 In addition, we queried a publicly available database(45) for mutations in amino acid positions  
260 undergoing a methylation event in order to identify sites linked to pathological conditions(46). This  
261 analysis uncovered mutations of 212 methylation sites that are co-localizing with phosphorylations  
262 (**Supplemental Table S3**). Notably, the functional score of phosphorylation sites colocalizing with  
263 methylation site mutations also had an above the median functional score (**Figure 5A**).

264 Our analysis suggest that protein methylation co-localizes with functionally important phosphorylation  
265 sites, suggesting crosstalk between the PTMs. However, whether crosstalk has a relevance in relation  
266 to regulation of cellular function needs to be further experimentally validated for each individual protein.

267

### 268 **Identification of a conserved PTM hotspot in actin**

269 Intrigued by the observations that the ACTA1-H75 methylation site colocalizes with the functional high-  
270 scoring ACTA1-Y71 phosphorylation site that is mutated in severe nemaline myopathy(47) as well as

271 the phosphorylation of the adjacent ACTA1-Y71 site (**Figure 5A** and **Supplemental Table S2**), we  
272 decided to do an in depth analysis of the region. Structurally, ACTA1-H75 is located in a loop which has  
273 been reported to sense nucleotide binding(48) (**Figure 5B**). The loop is perfectly conserved between  
274 humans, fly, plant, worm and yeast, emphasizing its functional importance (**Figure 5C**). To explore  
275 whether the ATP-sensing loop is targeted by additional PTMs, we again queried the PhosphositePlus  
276 database. This analysis revealed five annotated PTMs in the H75-containing nucleotide sensing loop  
277 and its flanking residues (**Figure 5D**), corresponding to mono-methylation, ubiquitination, and  
278 acetylation of K70 as well as phosphorylation of Y71 and T79. Notably, the bulk of these PTMs have  
279 also been observed in mouse actin (**Figure 5D**), indicating that modification of this loop is evolutionary  
280 conserved.

281 In summary, we observed disease associated mutations and PTMs at, and in proximity to, ACTA1-H75,  
282 a Hme site previously categorized as belonging to the core Hme-ome. The findings emphasize the  
283 functional importance of the ATP-sensing loop harboring H75 and support a model where multiple PTMs  
284 may play a role in actin regulation.

285

## 286 **Cellular effects of METTL9 KO**

287 Having uncovered hundreds of cellular Hme events and explored the subcellular distribution and context  
288 of the PTM, we sought to also investigate its direct biochemical functions. Human METTL9 was very  
289 recently described as a histidine methyltransferase introducing the bulk of 1MeH in mammalian  
290 proteomes through methylation of histidine in the context of a HxH motif, where “x” is a preferentially  
291 small amino acid such as alanine, glycine or serine(9). The reported specificity of METTL9 corresponds  
292 perfectly to our observed over-represented motif for Hme (**Figure 4B**), highlighting METTL9 gene  
293 targeted cells as a suitable model for studies of cellular Hme loss.

294 To uncover cellular processes regulated by Hme, we therefore obtained a CRISPR-mediated METTL9  
295 knockout (KO) HAP-1 cell line(49) and characterized its steady-state proteome, compared to a wild type  
296 (WT) control (**Figure 6A**). Cellular proteins were extracted and quantified using a label free MS approach  
297 (**Figure 6A**). Principal component analysis of protein intensities revealed a clear separation of WT and  
298 KO cells in the first component (**Figure 6B**), indicating that the difference between the cellular conditions  
299 exceed the technical experimental variation. Accordingly, hierarchical cluster analysis of proteins with a  
300 significant difference (Student's T-test,  $P\text{-adj} < 0.05$ ) in abundance between the conditions revealed two  
301 distinct clusters of over- and under-represented proteins in the KO cells (**Figure 6C**). To obtain insights  
302 into the processes and functions affected in the METTL9 KO cells we performed gene ontology analyses  
303 of the clusters. This analysis revealed vesicle and vesicle-related processes as under-represented and  
304 nuclear nucleic acid-associated processes as over-represented in the KO cells (**Figure 6D**). This  
305 suggests a complex and pleiotropic phenotype caused by METTL9 deletion and loss of pervasive Hme1.



## 306 **Discussion**

307 We here report the first large-scale analysis of Hme and demonstrate that the PTM is widespread in  
308 human cells and tissues. Our analyses indicate that the PTM is present in all major cellular  
309 compartments and that it is overrepresented in specific protein families, in particular in actin and in zinc-  
310 binding proteins. Taken together, we present the hitherto most extensive resource on cellular Hme  
311 events and perform the first system level analysis of the PTM.

312 Global PTM analysis almost invariably involves PTM affinity enrichment followed by MS analysis. Such  
313 approaches have contributed greatly to the knowledge on phosphorylation(50, 51), acetylation(52),  
314 ubiquitination(53), SUMOylation(54) and Rme(13) but it has been more challenging to generate robust  
315 affinity agents for proteomics characterization of Kme, and to the best of our knowledge, has not yet  
316 been tried for Hme. To study Hme, we here deployed an alternative brute-force approach, taking  
317 advantage of the high throughput of modern mass spectrometers, and queried ultra-comprehensive  
318 proteomic datasets for the PTM. To provide a benchmark for identified Hme events, we also searched  
319 the datasets for Rme and Kme. The strength of our approach can be highlighted by comparing our  
320 identified Kme-ome to the current state-of-the-art Kme proteomics studies. We identified 895 Kme  
321 events in HeLa cells alone (**Figure 2B**). For comparison, a study Cao et al(12) using lab-specific IgGs  
322 for all Kme states identified 552 Kme events in HeLa cells by another acknowledged study by Moore et  
323 al(11) using the bispecific Kme1 and Kme2 binding 3xMBT domain revealed 31 Kme events in 293T  
324 cells.

325 A drawback with our approach is the extensive laboratory work associated with off-line fractionation of  
326 peptides before MS analysis required to generate ultra-comprehensive proteomic datasets. Moreover,  
327 searching comprehensive datasets for several variable PTMs is both computationally challenging and  
328 time consuming. The establishment of Hme affinity enrichment workflows for MS would reduce the  
329 requirements for MS analysis time and data processing, and drastically reduce the efforts and costs

330 associated with our Hme-omic approach. Thus, we foresee efforts will be made towards the generation  
331 of Hme-specific affinity agents and their optimization for Hme-proteomic applications. The affinity agents  
332 can be generated though classical animal immunizations but this approach is inherently associated with  
333 low reproducibility(55). A more robust and reproducible approach would be to generate recombinant  
334 Hme-binders, using phage-displayed recombinant antibody libraries, an approach proven feasible for  
335 the PTM sulpho-tyrosine(56).

336 Affinity enrichment followed by MS is arguably the most widely employed approach to study PTMs. A  
337 prominent example of this is for phosphorylations, where affinity agents that specifically bind to the  
338 modified functional phosphate group exist(51). These rely on immobilized metal cations with affinity for  
339 the negatively charged phosphate group and can consequently be used for enrichment of  
340 phosphorylated serine, threonine and tyrosine(10). For protein methylations, which are small and  
341 chemically subtle PTMs, there are no such affinity agents available. Antibodies and specific methyl-state  
342 binding protein domains have instead been used to enrich Kme and Rme modified peptides for MS(11–  
343 13). However, antibodies and domains often display a preference for PTMs in specific contexts. For  
344 example, several Rme antibodies have a preference for flanking residues(57) and the affinity of Kme-  
345 binding domains can be affected by neighboring PTMs, such as phosphorylation(58). Although the depth  
346 of the histidine methylome may conceivably be increased beyond this study through future affinity  
347 enrichment-based approaches, the herein identified Hme events, and the subsequent bioinformatic  
348 analysis, is not skewed or biased through context-specific affinity agents.

349 Our proteomic characterization of METTL9 KO cells suggests a complex phenotype with perturbations  
350 of both vesicle-associated and nuclear-linked cellular process. A recent study suggested the presence  
351 of as many as 2807 candidate METTL9 target sites (HxH, x = A, N, G, S or T) in the human proteome(9).  
352 Our observed pleiotropic phenotype for METTL9 KO cells may be linked to the large number of plausible  
353 substrates for the enzyme, which will likely be subjects for future studies. The large number of substrates

354 for METTL9 also render our METTL9 targeted cells a poor tool to study biochemical functions of  
355 individual Hme events. Instead, we suggest ectopic expression of WT and HxH-mutated METTL9  
356 substrates in cells as a preferred approach.

357 Actin proteins are subject to a wide range of PTMs, many of which have determined regulatory  
358 function(59). One prominent example is SETD3 mediated methylation of ACTB-H73, which corresponds  
359 to ACTA1-H75, which modulates actin dynamics by accelerating the assembly of actin filaments, a  
360 process preventing primary dystocia(6). Another example, is a unique multi-step N-terminal processing  
361 and modification machinery involving N-terminal acetylation of the initiating methionine (iMet), followed  
362 by excision of iMet and subsequent acetylation of the residue in position 2(60). Our integrated analysis  
363 of Hme colocalization with machine learning predicted functional importance scored phosphorylation  
364 events (**Figure 5A**) uncovered ACTA1-H75 as colocalizing with ACTA1-Y71 phosphorylation, a site  
365 attributed with a high function score (0.62)<sup>20</sup>. Interestingly, we observed five additional PTMs in the six  
366 up- and downstream residues, of these four had also been reported to occur in mouse (**Figure 5D**). To  
367 the best of our knowledge, so far only H75 methylation has been the subject of detailed biochemical  
368 studies. The multiple modifications within the loop reassembles the numerous PTMs in the flexible tail  
369 of histone H3, a key component of the histone code determining chromatin compaction state and gene  
370 activity. Given the extent of PTMs in the functionally important ATP-sensing loop, a similar “actin code”  
371 may exist, where multiple dynamic PTMs collectively, or individually, determine the molecular functions  
372 of actin.

373 The protein methylation dataset we have generated may support further studies on Hme and we  
374 envision three direct applications. First, synthetic peptides corresponding to the relatively small HeLa  
375 Hme-ome (n=299) can be generated and evaluated as substrates for new candidate histidine  
376 methyltransferase enzymes. The human genome encodes over 200 predicted methyltransferases(61)  
377 and given the abundance and sequence diversity of identified Hme events (**Supplementary Table S1**),

378 a considerable fraction of these may catalyze Hme. Candidate histidine methyltransferases may be  
379 cloned, expressed, and isolated from bacterial systems, and evaluated for activity on peptide arrays  
380 comprising the Hme-ome. Second, a synthetic peptide library corresponding to the Hme-ome may be  
381 used to uncover Hme-driven protein interactions for yet not discovered Hme reader proteins and Hme  
382 demethylases through affinity-enrichment MS approaches(27, 62). Third, our resource provides the  
383 necessary information to design large-scale targeted MS methods(63) for Hme that can be used to  
384 further explore the regulation and variation of Hme-ome in human cells, tissues, and biological fluids.

385 In summary, our data extends the current knowledge of Hme and the study represents the first system  
386 level analysis of the PTM. Finally, we encourage the research community to use this resource for large-  
387 scale targeted MS and detailed biochemical studies of individual sites to shed further light on the  
388 emerging field of protein methylation biology.

389 **DATA AVAILABILITY**

390 Available on request to [Magnus.Jakobsson@Immun.LTH.se](mailto:Magnus.Jakobsson@Immun.LTH.se)

391

392 **ACKNOWLEDGEMENTS**

393 We would like to thank the Proteoforms@LU mass spectrometry infrastructure research team for useful  
394 discussion and manuscript input, Jesper V. Olsen for providing early access to proteomics datasets and  
395 Júlia Szántó for assistance with HAP-1 cell culture.

396

397 **FUNDING**

398 The Crafoord Foundation [ref 20200526].

399 **References**

- 400 1. Johnson,P., Harris,C.I. and Perry,S. V. (1967) 3-Methylhistidine in Actin and Other Muscle Proteins.  
401 *Biochem. J.*, **105**, 361–370.
- 402 2. Huszar,G. and Elzinga,M. (1972) Homologous methylated and nonmethylated histidine peptides in  
403 skeletal and cardiac myosins. *J. Biol. Chem.*, **247**, 745–753.
- 404 3. Kwiatkowski,S. and Drozak,J. (2020) Protein Histidine Methylation. *Curr. Protein Pept. Sci.*, **21**,  
405 675–689.
- 406 4. Strahl,B.D. and Allis,C.D. (2000) The language of covalent histone modifications. *Nature*, **403**, 41–  
407 45.
- 408 5. Kwiatkowski,S., Seliga,A.K., Vertommen,D., Terreri,M., Ishikawa,T., Grabowska,I., Tiebe,M.,  
409 Teleman,A.A., Jagielski,A.K., Veiga-Da-Cunha,M., *et al.* (2018) SETD3 protein is the actin-  
410 specific histidine N-methyltransferase. *Elife*, **7**, 1–42.
- 411 6. Wilkinson,A.W., Diep,J., Dai,S., Liu,S., Ooi,Y.S., Song,D., Li,T.M., Horton,J.R., Zhang,X., Liu,C., *et*  
412 *al.* (2019) SETD3 is an actin histidine methyltransferase that prevents primary dystocia. *Nature*,  
413 **565**, 372–376.
- 414 7. Kernstock,S., Davydova,E., Jakobsson,M., Moen,A., Pettersen,S., Mælandsmo,G.M., Egge-  
415 Jacobsen,W. and Falnes,P.Ø. (2012) Lysine methylation of VCP by a member of a novel human  
416 protein methyltransferase family. *Nat. Commun.*, **3**, 1038.
- 417 8. Webb,K.J., Zurita-Lopez,C.I., Al-Hadid,Q., Laganowsky,A., Young,B.D., Lipson,R.S., Souda,P.,  
418 Faull,K.F., Whitelegge,J.P. and Clarke,S.G. (2010) A novel 3-methylhistidine modification of  
419 yeast ribosomal protein Rpl3 is dependent upon the YIL110W methyltransferase. *J. Biol. Chem.*,  
420 **285**, 37598–37606.

- 421 9. Davydova,E., Shimazu,T., Schuhmacher,M.K., Jakobsson,M.E., Willemen,H.L.D.M., Liu,T.,  
422 Moen,A., Ho,A.Y.Y., Schroer,L., Pinto,R., *et al.* (2021) The methyltransferase METTL9 mediates  
423 pervasive 1-methylhistidine modification in mammalian proteomes. *Nat. Commun.*,  
424 10.1038/s41467-020-20670-7.
- 425 10. Olsen,J. V. and Mann,M. (2013) Status of Large-scale Analysis of Post-translational Modifications  
426 by Mass Spectrometry. *Mol. Cell. Proteomics*, **12**, 3444–3452.
- 427 11. Moore,K.E., Carlson,S.M., Camp,N.D., Cheung,P., James,R.G., Chua,K.F., Wolf-yadlin,A. and  
428 Gozani,O. (2013) A General Molecular Affinity Strategy for Global Detection and Proteomic  
429 Analysis of Lysine Methylation. *Mol. Cell*, **50**, 444–456.
- 430 12. Cao,X.J., Arnaudo,A.M. and Garcia,B.A. (2013) Large-scale global identification of protein lysine  
431 methylation in vivo. *Epigenetics*, **8**, 477–485.
- 432 13. Larsen,S.C., Sylvestersen,K.B., Mund,A., Lyon,D., Mullari,M., Madsen,M. V., Daniel,J.A.,  
433 Jensen,L.J. and Nielsen,M.L. (2016) Proteome-wide analysis of arginine monomethylation  
434 reveals widespread occurrence in human cells. *Sci. Signal.*, **9**, 1–15.
- 435 14. Devabhaktuni,A., Lin,S., Zhang,L., Swaminathan,K., Gonzalez,C.G., Olsson,N., Pearlman,S.M.,  
436 Rawson,K. and Elias,J.E. (2019) TagGraph reveals vast protein modification landscapes from  
437 large tandem mass spectrometry datasets. *Nat. Biotechnol.*, **37**, 469–479.
- 438 15. Bekker-Jensen,D.B., Kelstrup,C.D., Batth,T.S., Larsen,S.C., Haldrup,C., Bramsen,J.B.,  
439 Sørensen,K.D., Høyer,S., Ørntoft,T.F., Andersen,C.L., *et al.* (2017) An Optimized Shotgun  
440 Strategy for the Rapid Generation of Comprehensive Human Proteomes. *Cell Syst.*, **4**, 587-  
441 599.e4.
- 442 16. Deutsch,E.W., Csordas,A., Sun,Z., Jarnuczak,A., Perez-Riverol,Y., Ternent,T., Campbell,D.S.,

- 443 Bernal-Llinares,M., Okuda,S., Kawano,S., *et al.* (2017) The ProteomeXchange consortium in  
444 2017: Supporting the cultural change in proteomics public data deposition. *Nucleic Acids Res.*,  
445 **45**, D1100–D1106.
- 446 17. Cox,J. and Mann,M. (2008) MaxQuant enables high peptide identification rates, individualized  
447 p.p.b.-range mass accuracies and proteome-wide protein quantification. *Nat. Biotechnol.*, **26**,  
448 1367–1372.
- 449 18. Hornbeck,P. V., Kornhauser,J.M., Tkachev,S., Zhang,B., Skrzypek,E., Murray,B., Latham,V. and  
450 Sullivan,M. (2012) PhosphoSitePlus: A comprehensive resource for investigating the structure  
451 and function of experimentally determined post-translational modifications in man and mouse.  
452 *Nucleic Acids Res.*, **40**, 261–270.
- 453 19. Orre,L.M., Vesterlund,M., Pan,Y., Arslan,T., Zhu,Y., Fernandez Woodbridge,A., Frings,O.,  
454 Fredlund,E. and Lehtiö,J. (2019) SubCellBarCode: Proteome-wide Mapping of Protein  
455 Localization and Relocalization. *Mol. Cell*, **73**, 166-182.e7.
- 456 20. Savojardo,C., Martelli,P.L., Fariselli,P., Profiti,G. and Casadio,R. (2018) BUSCA: An integrative  
457 web server to predict subcellular localization of proteins. *Nucleic Acids Res.*, **46**, W459–W466.
- 458 21. Ochoa,D., Jarnuczak,A.F., Viéitez,C., Gehre,M., Soucheray,M., Mateus,A., Kleefeldt,A.A., Hill,A.,  
459 Garcia-Alonso,L., Stein,F., *et al.* (2020) The functional landscape of the human  
460 phosphoproteome. *Nat. Biotechnol.*, **38**, 365–373.
- 461 22. Hunter,S., Apweiler,R., Attwood,T.K., Bairoch,A., Bateman,A., Binns,D., Bork,P., Das,U.,  
462 Daugherty,L., Duquenne,L., *et al.* (2009) InterPro: The integrative protein signature database.  
463 *Nucleic Acids Res.*, **37**, 211–215.
- 464 23. Bateman,A., Coin,L., Durbin,R., Finn,R.D., Hollich,V., Griffiths-Jones,S., Khanna,A., Marshall,M.,



- 465 Moxon,S., Sonnhammer,E.L.L., *et al.* (2004) The Pfam protein families database. *Nucleic Acids*  
466 *Res.*, **32**, 138–141.
- 467 24. Szklarczyk,D., Gable,A.L., Lyon,D., Junge,A., Wyder,S., Huerta-Cepas,J., Simonovic,M.,  
468 Doncheva,N.T., Morris,J.H., Bork,P., *et al.* (2019) STRING v11: Protein-protein association  
469 networks with increased coverage, supporting functional discovery in genome-wide experimental  
470 datasets. *Nucleic Acids Res.*, **47**, D607–D613.
- 471 25. Colaert,N., Helsens,K., Martens,L., Vandekerckhove,J. and Gevaert,K. (2009) Improved  
472 visualization of protein consensus sequences by iceLogo. *Nat. Methods*, **6**, 786–787.
- 473 26. Kelstrup,C.D., Jersie-Christensen,R.R., Batth,T.S., Arrey,T.N., Kuehn,A., Kellmann,M. and  
474 Olsen,J. V. (2014) Rapid and deep proteomes by faster sequencing on a benchtop quadrupole  
475 ultra-high-field orbitrap mass spectrometer. *J. Proteome Res.*, **13**, 6187–6195.
- 476 27. Jakobsson,M.E., Małeckı,J.M., Halabelian,L., Nilges,B.S., Pinto,R., Kudithipudi,S., Munk,S.,  
477 Davydova,E., Zuhairi,F.R., Arrowsmith,C.H., *et al.* (2018) The dual methyltransferase METTL13  
478 targets N terminus and Lys55 of eEF1A and modulates codon-specific translation rates. *Nat.*  
479 *Commun.*, **9**, 3411.
- 480 28. Tyanova,S., Temu,T., Sinitcyn,P., Carlson,A., Hein,M.Y., Geiger,T., Mann,M. and Cox,J. (2016)  
481 The Perseus computational platform for comprehensive analysis of (prote)omics data. *Nat.*  
482 *Methods*, **13**, 731–740.
- 483 29. Potel,C.M., Lin,M.H., Prust,N., Van Den Toorn,H.W.P., Heck,A.J.R. and Lemeer,S. (2019) Gaining  
484 Confidence in the Elusive Histidine Phosphoproteome. *Anal. Chem.*, **91**, 5542–5547.
- 485 30. Trelle,M.B. and Jensen,O.N. (2008) Utility of immonium ions for assignment of  $\epsilon$ -N-acetyllysine-  
486 containing peptides by tandem mass spectrometry. *Anal. Chem.*, **80**, 3422–3430.

- 487 31. Steen,H. and Mann,M. (2004) The ABC's (and XYZ's) of peptide sequencing. *Nat. Rev. Mol. Cell*  
488 *Biol.*, **5**, 699–711.
- 489 32. Ly,T. and Lamond,A.I. (2017) New Apex in Proteome Analysis. *Cell Syst.*, **4**, 581–582.
- 490 33. Ning,Z., Star,A.T., Mierzwa,A., Lanouette,S., Mayne,J., Couture,J.F. and Figeys,D. (2016) A  
491 charge-suppressing strategy for probing protein methylation. *Chem. Commun.*, **52**, 5474–5477.
- 492 34. Bantscheff,M., Schirle,M., Sweetman,G., Rick,J. and Kuster,B. (2007) Quantitative mass  
493 spectrometry in proteomics: A critical review. *Anal. Bioanal. Chem.*, **389**, 1017–1031.
- 494 35. Falnes,P.Ø., Jakobsson,M.E., Davydova,E., Ho,A. and Małeckı,J. (2016) Protein lysine  
495 methylation by seven- $\beta$ -strand methyltransferases. *Biochem. J.*, **473**, 1995–2009.
- 496 36. Turner,B.M. (2002) Cellular memory and the histone code. *Cell*, **111**, 285–291.
- 497 37. Jakobsson,M.E., Małeckı,J., Nilges,B.S., Moen,A., Leidel,S.A. and Falnes,P.Ø. (2017) Methylation  
498 of human eukaryotic elongation factor alpha (eEF1A) by a member of a novel protein lysine  
499 methyltransferase family modulates mRNA translation. *Nucleic Acids Res.*, **45**, 8239–8254.
- 500 38. Jakobsson,M.E., Małeckı,J. and Falnes,P.Ø. (2018) Regulation of eukaryotic elongation factor 1  
501 alpha (eEF1A) by dynamic lysine methylation. *RNA Biol.*, **6286**, 01–11.
- 502 39. Jakobsson,M.E., Moen,A., Bousset,L., Egge-Jacobsen,W., Kernstock,S., Melki,R. and Falnes,P.  
503 (2013) Identification and characterization of a novel human methyltransferase modulating Hsp70  
504 protein function through lysine methylation. *J. Biol. Chem.*, **288**, 27752–27763.
- 505 40. Jakobsson,M.E., Moen,A. and Falnes,P.O. (2016) Correspondence: On the enzymology and  
506 significance of HSPA1 lysine methylation. *Nat Commun*, **7**, 11464.
- 507 41. Szewczyk,M.M., Ishikawa,Y., Organ,S., Sakai,N., Li,F., Halabelian,L., Ackloo,S., Couzens,A.L.,

- 508 Eram,M., Dilworth,D., *et al.* (2020) Pharmacological inhibition of PRMT7 links arginine  
509 monomethylation to the cellular stress response. *Nat. Commun.*, **11**, 1–15.
- 510 42. Sonnhammer,E.L.L., Eddy,S.R., Birney,E., Bateman,A. and Durbin,R. (1998) Pfam: Multiple  
511 sequence alignments and HMM-profiles of protein domains. *Nucleic Acids Res.*, **26**, 320–322.
- 512 43. Sabbattini,P., Sjoberg,M., Nikic,S., Frangini,A., Holmqvist,P.H., Kunowska,N., Carroll,T.,  
513 Brookes,E., Arthur,S.J., Pombo,A., *et al.* (2014) An H3K9/S10 methyl-phospho switch modulates  
514 Polycomb and Pol II binding at repressed genes during differentiation. *Mol. Biol. Cell*, **25**, 904–  
515 915.
- 516 44. Estéve,P.O., Chang,Y., Samaranayake,M., Upadhyay,A.K., Horton,J.R., Feehery,G.R., Cheng,X.  
517 and Pradhan,S. (2011) A methylation and phosphorylation switch between an adjacent lysine and  
518 serine determines human DNMT1 stability. *Nat. Struct. Mol. Biol.*, **18**, 42–49.
- 519 45. Liu,X., Wu,C., Li,C. and Boerwinkle,E. (2016) dbNSFP v3.0: A One-Stop Database of Functional  
520 Predictions and Annotations for Human Nonsynonymous and Splice-Site SNVs. *Hum. Mutat.*, **37**,  
521 235–241.
- 522 46. Landrum,M.J., Lee,J.M., Riley,G.R., Jang,W., Rubinstein,W.S., Church,D.M. and Maglott,D.R.  
523 (2014) ClinVar: Public archive of relationships among sequence variation and human phenotype.  
524 *Nucleic Acids Res.*, **42**, 980–985.
- 525 47. Garcia-Angarita,N., Kirschner,J., Heiliger,M., Thirion,C., Walter,M.C., Schnittfeld-Acarlioglu,S.,  
526 Albrecht,M., Müller,K., Wieczorek,D., Lochmüller,H., *et al.* (2009) Severe nemaline myopathy  
527 associated with consecutive mutations E74D and H75Y on a single ACTA1 allele. *Neuromuscul.*  
528 *Disord.*, **19**, 481–484.
- 529 48. Dominguez,R. and Holmes,K.C. (2011) Actin structure and function. *Annu. Rev. Biophys.*, **40**,

530 169–186.

531 49. Essletzbichler,P., Konopka,T., Santoro,F., Chen,D., Gapp,B. V., Kralovics,R., Brummelkamp,T.R.,  
532 Nijman,S.M.B. and Bürckstümmer,T. (2014) Megabase-scale deletion using CRISPR/Cas9 to  
533 generate a fully haploid human cell line. *Genome Res.*, **24**, 2059–2065.

534 50. Olsen,J. V, Vermeulen,M., Santamaria,A., Kumar,C., Miller,M.L., Jensen,L.J., Gnad,F., Cox,J.,  
535 Jensen,T.S., Nigg,E.A., *et al.* (2010) Quantitative phosphoproteomics reveals widespread full  
536 phosphorylation site occupancy during mitosis. *Sci. Signal.*, **3**, ra3.

537 51. Olsen,J. V, Blagoev,B., Gnad,F., Macek,B., Kumar,C., Mortensen,P. and Mann,M. (2006) Global,  
538 In Vivo, and Site-Specific Phosphorylation Dynamics in Signaling Networks. *Cell*, **127**, 635–648.

539 52. Choudhary,C., Kumar,C., Gnad,F., Nielsen,M.L., Rehman,M., Walther,T.C., Olsen,J. V and  
540 Mann,M. (2009) Lysine acetylation targets protein complexes and co-regulates major cellular  
541 functions. *Science (80- )*, **325**, 834–40.

542 53. Akimov,V., Barrio-Hernandez,I., Hansen,S.V.F., Hallenborg,P., Pedersen,A.K., Bekker-  
543 Jensen,D.B., Puglia,M., Christensen,S.D.K., Vanselow,J.T., Nielsen,M.M., *et al.* (2018) Ubisite  
544 approach for comprehensive mapping of lysine and n-terminal ubiquitination sites. *Nat. Struct.*  
545 *Mol. Biol.*, **25**.

546 54. Hendriks,I.A., Lyon,D., Young,C., Jensen,L.J., Vertegaal,A.C.O. and Nielsen,M.L. (2017) Site-  
547 specific mapping of the human SUMO proteome reveals co-modification with phosphorylation.  
548 *Nat. Struct. Mol. Biol.*, **24**, 325–336.

549 55. Gray,A., Bradbury,A.R.M., Knappik,A., Plückthun,A., Borrebaeck,C.A.K. and Dübel,S. (2020)  
550 Animal-free alternatives and the antibody iceberg. *Nat. Biotechnol.*, **38**, 1234–1239.

551 56. Kehoe,J.W., Velappan,N., Walbolt,M., Rasmussen,J., King,D., Lou,J., Knopp,K., Pavlik,P.,

- 552 Marks, J.D., Bertozzi, C.R., *et al.* (2006) Using Phage Display to Select Antibodies Recognizing  
553 Post-translational Modifications Independently of Sequence Context. *Mol. Cell. Proteomics*, **5**,  
554 2350–2363.
- 555 57. Gayatri, S., Cowles, M.W., Vemulapalli, V., Cheng, D., Sun, Z.W. and Bedford, M.T. (2016) Using  
556 oriented peptide array libraries to evaluate methylarginine-specific antibodies and arginine  
557 methyltransferase substrate motifs. *Sci. Rep.*, **6**, 1–8.
- 558 58. Bock, I., Kudithipudi, S., Tamas, R., Kungulovski, G., Dhayalan, A. and Jeltsch, A. (2011) Application  
559 of Celluspot peptide arrays for the analysis of the binding specificity of epigenetic reading  
560 domains to modified histone tails. *BMC Biochem.*, **12**, 48.
- 561 59. Varland, S., Vandekerckhove, J. and Drazic, A. (2019) Actin Post-translational Modifications: The  
562 Cinderella of Cytoskeletal Control. *Trends Biochem. Sci.*, **44**, 502–516.
- 563 60. Aksnes, H., Ree, R. and Arnesen, T. (2019) Co-translational, Post-translational, and Non-catalytic  
564 Roles of N-Terminal Acetyltransferases. *Mol. Cell*, **73**, 1097–1114.
- 565 61. Petrossian, T.C. and Clarke, S.G. (2011) Uncovering the human methyltransferasome. *Mol. Cell.*  
566 *Proteomics*, **10**, M110.000976.
- 567 62. Meyer, K. and Selbach, M. (2020) Peptide-based interaction proteomics. *Mol. Cell. Proteomics*, **19**,  
568 1070–1075.
- 569 63. Peterson, A.C., Russell, J.D., Bailey, D.J., Westphall, M.S. and Coon, J.J. (2012) Parallel reaction  
570 monitoring for high resolution and high mass accuracy quantitative, targeted proteomics. *Mol.*  
571 *Cell. Proteomics*, **11**, 1475–1488.
- 572 64. Perez-Riverol, Y., Csordas, A., Bai, J., Bernal-Llinares, M., Hewapathirana, S., Kundu, D.J.,  
573 Inuganti, A., Griss, J., Mayer, G., Eisenacher, M., *et al.* (2019) The PRIDE database and related

574 tools and resources in 2019: Improving support for quantification data. *Nucleic Acids Res.*, **47**,

575 D442–D450.

576

577 **FIGURES**

578

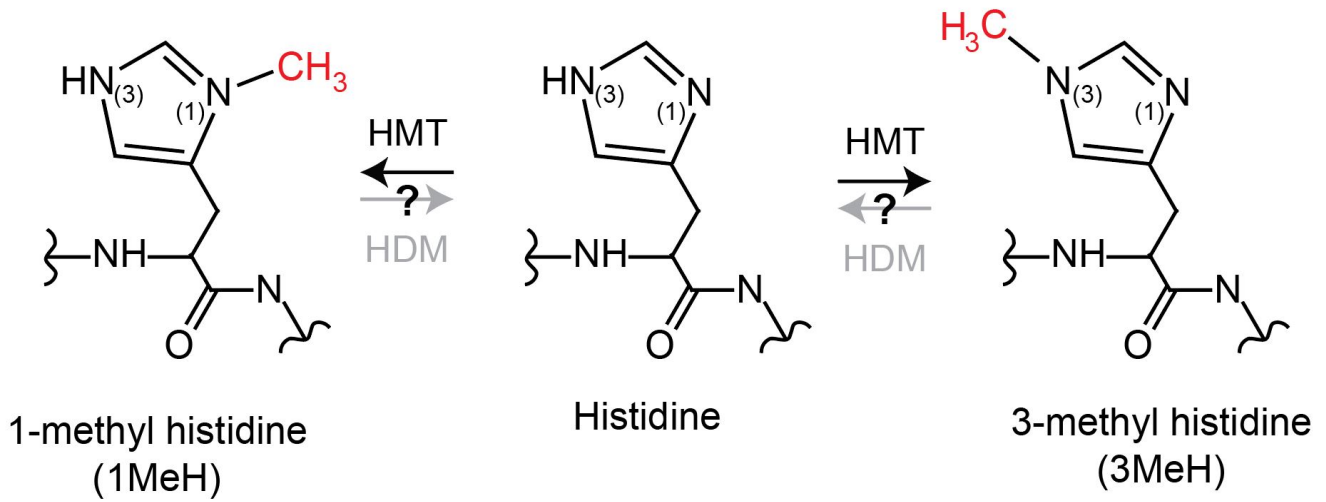

579

580 **Figure 1. Biochemistry of protein histidine methylation.**

581 Structure of the different methylated forms of histidine. The methylations are enzymatically introduced  
582 by histidine (H) methyltransferases (HMT) and may potentially be removed by histidine (H)  
583 demethylases (KDM).

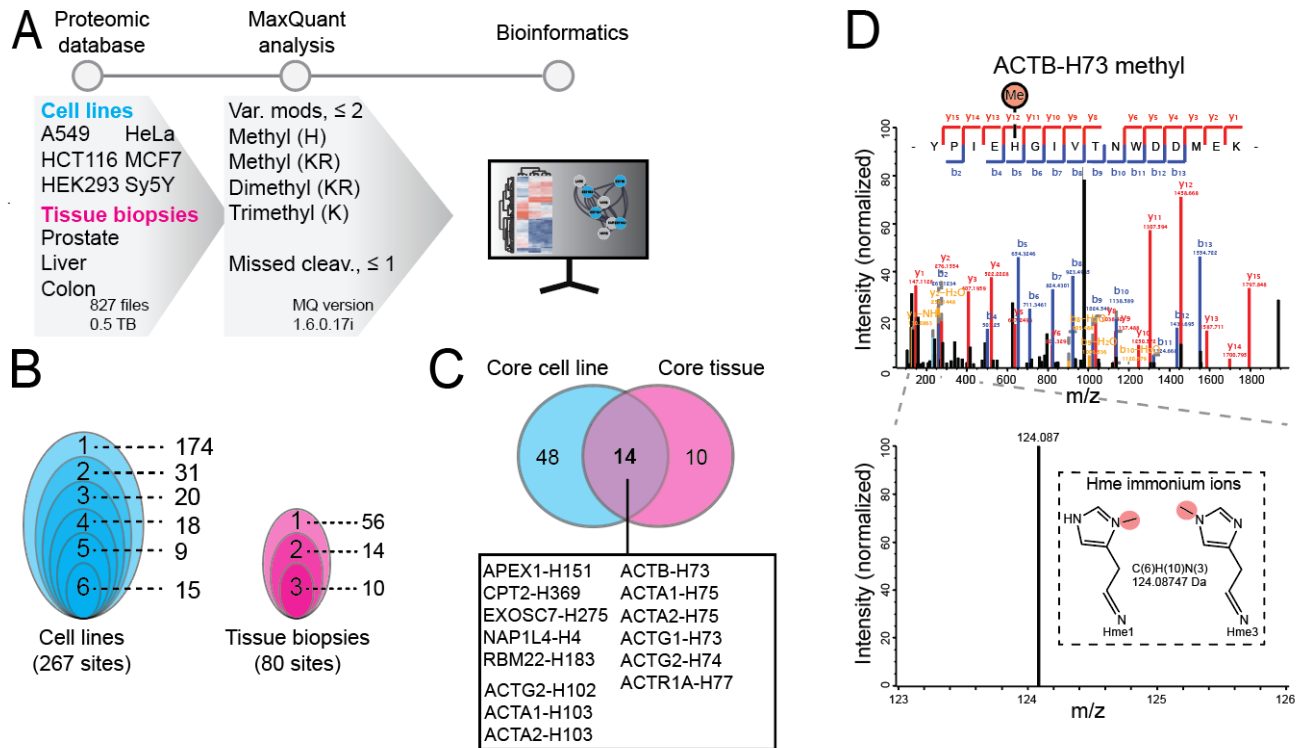

584

585 **Figure 2. Exploring histidine methylation in human cells and tissues.**

586 **(A)** Methylome profiling workflow. Publicly available ultra-comprehensive proteomics datasets from  
587 human cell lines and tissue biopsies were searched for histidine, lysine and arginine methylation using  
588 MaxQuant. Identified histidine methylation events were analyzed to explore the abundance and cellular  
589 context of the PTM.

590 **(B)** Clam plot representation of histidine methylation sites identified in cells and tissues. The total  
591 number of sites and the number of shared sites between cell lines (left) and tissue biopsies (right) are  
592 indicated.

593 **(C)** Core histidine methylation sites. Sites were categorized as part of the core methylome if identified  
594 in more than 50% of the samples in each category.



595 **(D)** Mass spectra supporting methylation of ACTB-H73. Tandem mass for a tryptic peptide covering  
596 Y69-K84 of ACTB unambiguously supporting methylation of H73. The presence of a specific immonium  
597 ion corresponding to methyl-histidine is indicated.

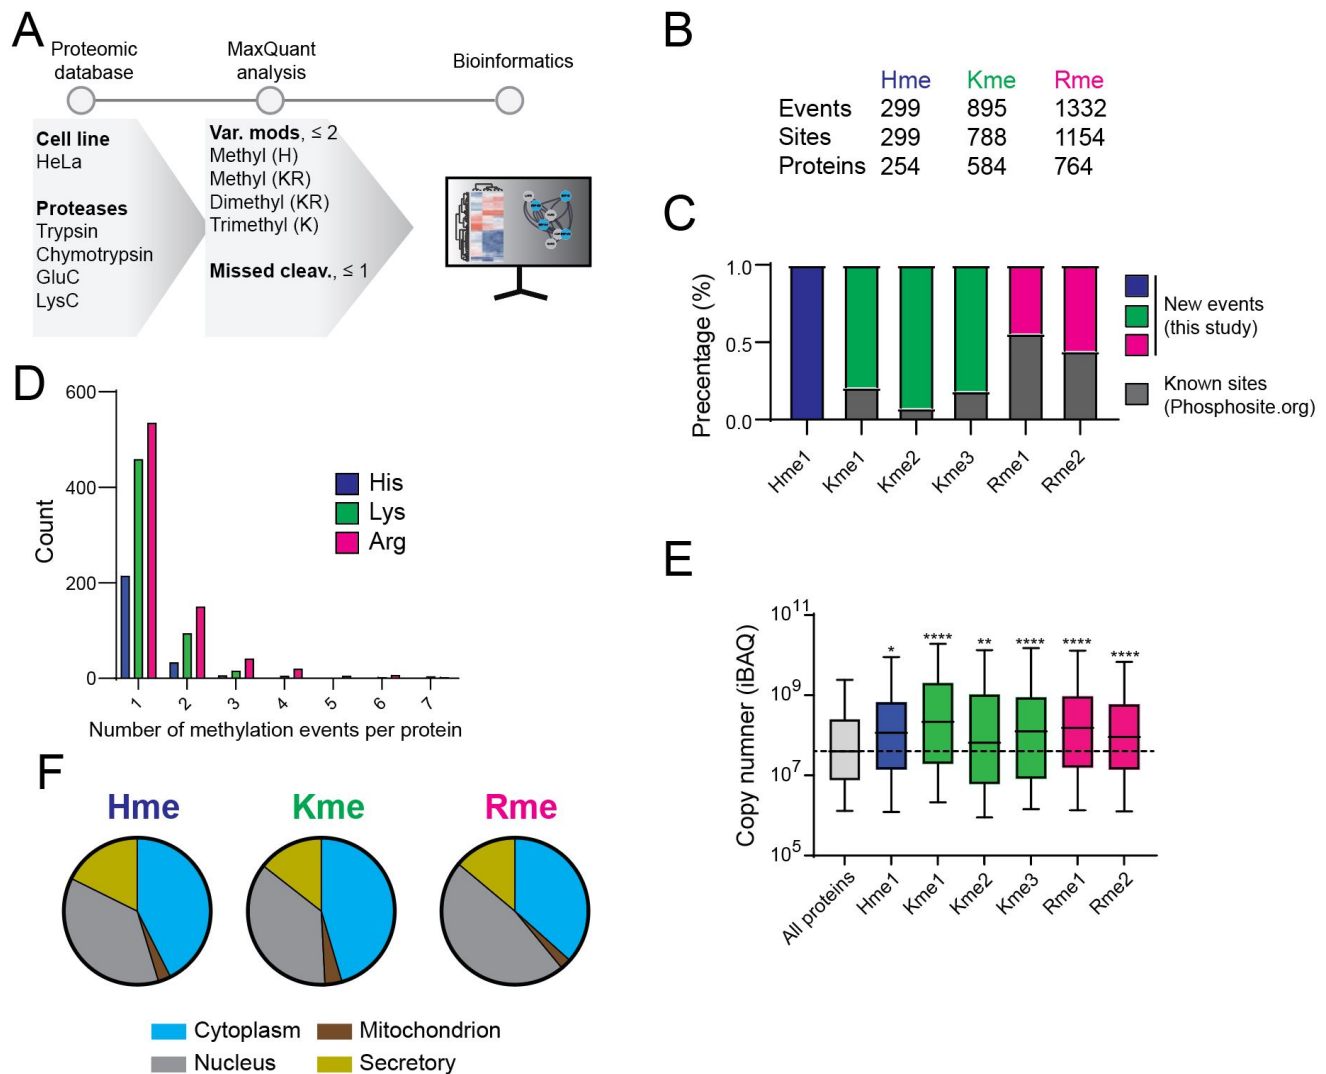

598

599 **Figure 3. In-depth characterization of the HeLa methylome.**

600 (A) HeLa-specific methylome profiling workflow. A panel of comprehensive proteomic datasets  
 601 generated using several proteases to obtain extensive proteome and PTM coverage were searched for  
 602 histidine, lysine and arginine methylation. The identified histidine methylation events were explored  
 603 using a range of bioinformatic tools and benchmarked to identified lysine and arginine methylation.

604 (B) Total counts of distinct methylation events, methylation sites and targeted proteins are indicated.

605 (C) The percentage of sites identified in this study as compared to the dataset available from  
606 PhosphoSitePlus.

607 (D) The number of methylation events per protein.

608 (E) Cellular abundance of methyl proteins. The distribution of iBAQ values for proteins harboring a  
609 methylation site is shown. Significance was assessed for each group compared to control (All proteins)  
610 by multiple comparison using one-way ANOVA, (adjusted P value <0.01).

611 (F) Subcellular localization of proteins for Hme, Kme, Rme assigned to a designated compartment  
612 neighborhood as described in the SubCellBarcode project. Each methylation type as a relative  
613 distribution in the nucleus, cytoplasm, mitochondria and secretory compartment.

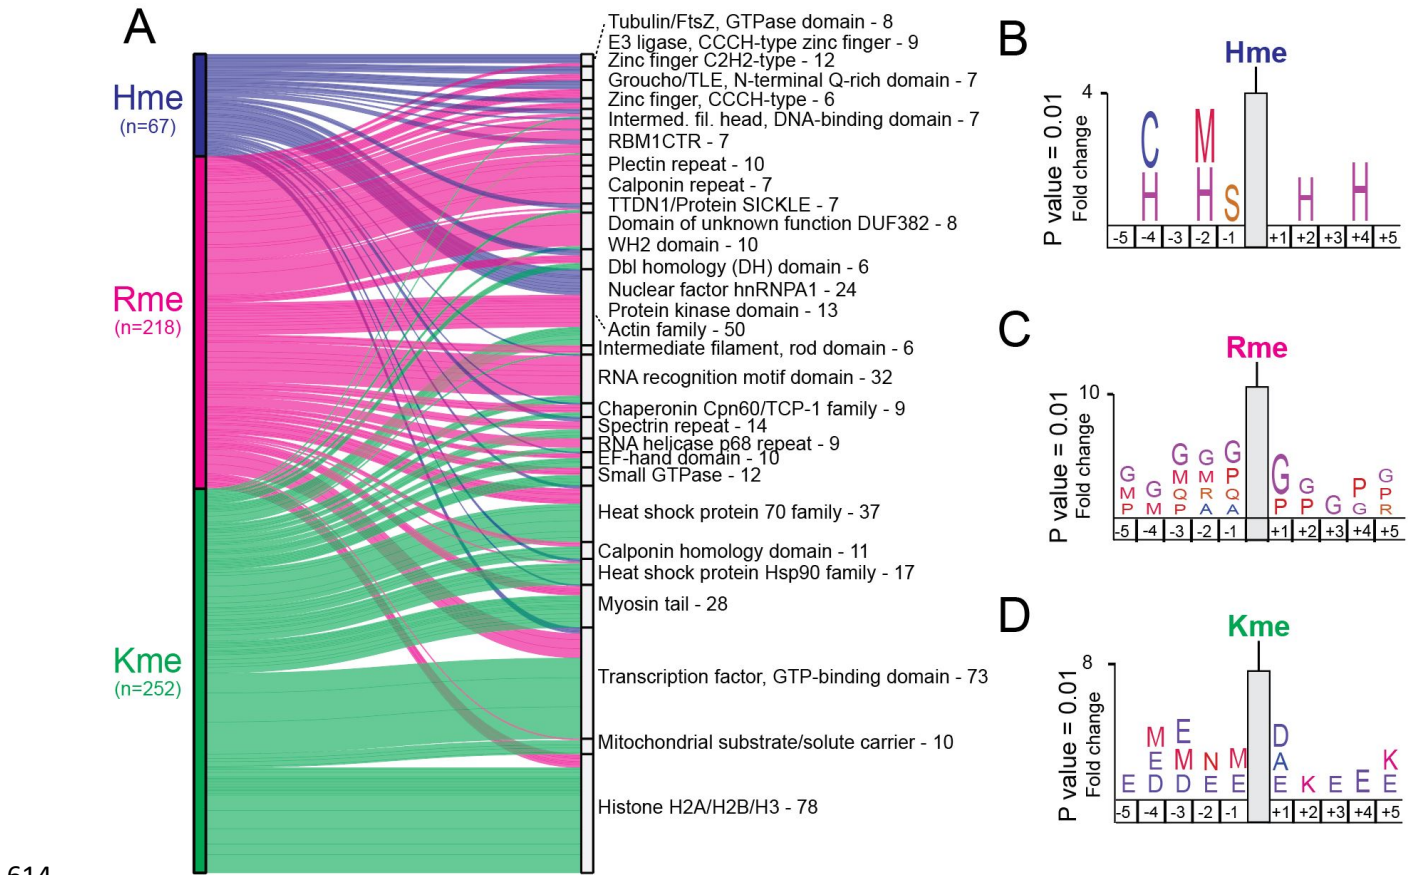

614

615 **Figure 4. Domains and sites targeted by methylation.**

616 (A) Sankey plot illustrating the top 30 Pfam domains targeted by histidine, arginine and lysine  
 617 methylation in HeLa cells. Total number of unique methylation sites residing within an annotated protein  
 618 domain in the Pfam database is indicated. Statistical analysis for significantly enriched domains is shown  
 619 in **Supplementary Figure S6**.

620 (B-D) Methylome sequence logos. Logos illustrating over representation of amino acids in the 5  
 621 positions up- and down-stream of identified (B) Hme, (C) Rme, and (D) Kme sites. Full sequence logos  
 622 and heatmap analysis are shown in **Supplementary Figure S7**.

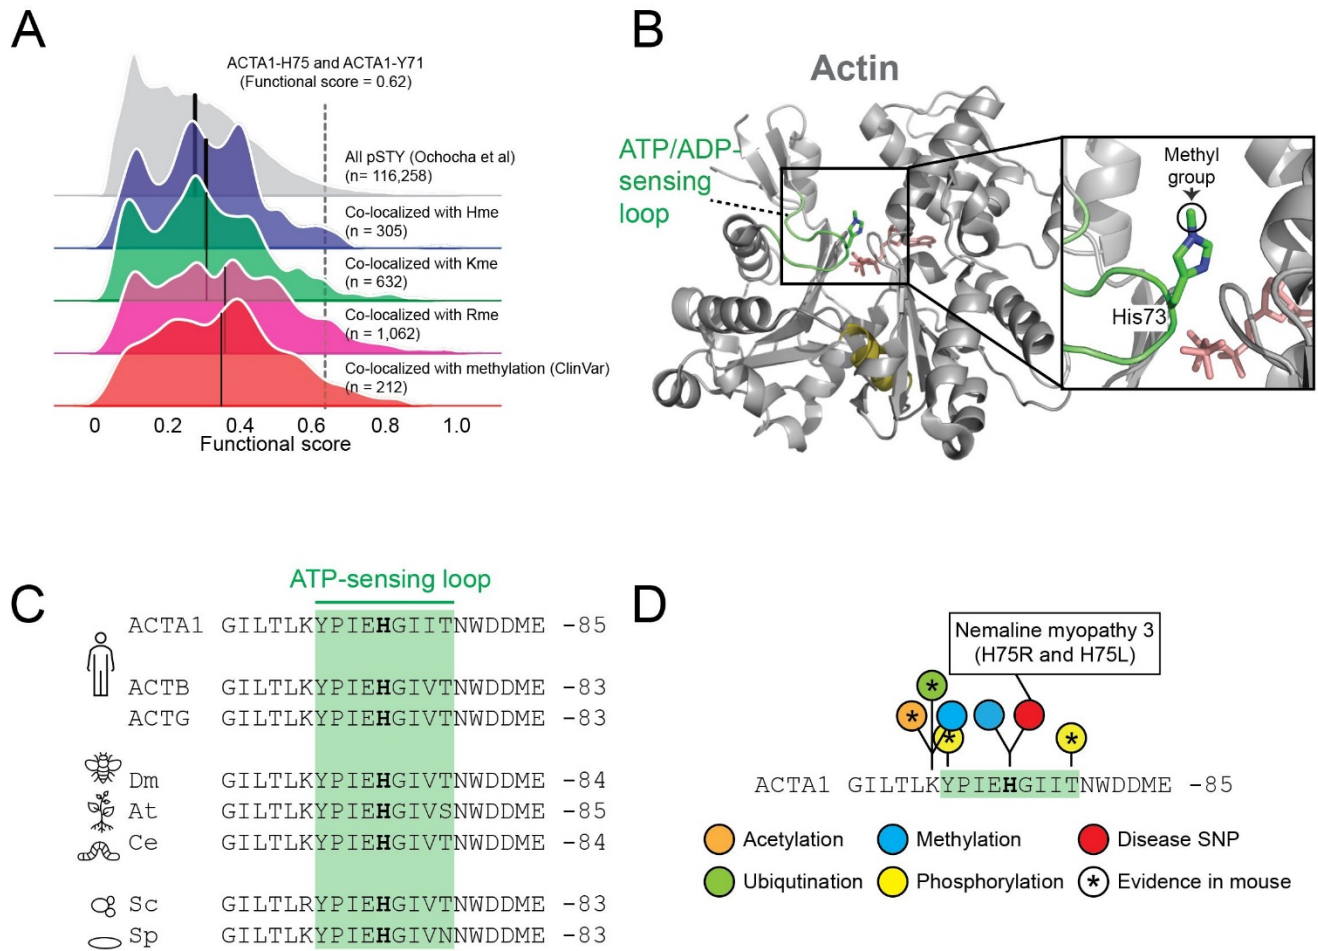

623

624 **Figure 5. PTM colocalization.**

625 (A) Kernel density plots for the functional score distributions of colocalizing phosphorylation sites with  
 626 identified methylation events. Subsets of phosphorylation sites colocalizing with Rme, Kme or Hme  
 627 methylation sites plotted separately. Separate grouping of phosphorylation sites co-localizing with  
 628 methylation sites with a reported polymorphism or mutation associated with a pathological condition  
 629 (ClinVar) is shown. Black line indicate group mean. Methylation of ACTA1-H75 and the colocalizing  
 630 phosphorylation event on ACTA1-Y71 are indicated.

631 (B) The structural context of actin histidine methylation. The structure of actin is shown in cartoon  
 632 representation whereas ATP and the methylated histidine residue H73 is shown in stick representation.

633 The hinge region (olive), ATP (salmon) and the H73 containing ATP-sensing loop (green) are indicated.  
634 The structure is derived from rabbit muscle alpha actin (PDB #1EQYE).

635 **(C)** Evolutionary conservation of the methyl-histidine containing loop in actin. Sequences: human  
636 ACTA1 (P68133), ACTB (P60709) and ACTG (P63261) as well as homologues from *Drosophila*  
637 *melanogaster* (dm; AAA28314.1), *Arabidopsis thaliana* (at; NP\_187818.1), *Caenorhabditis elegans* (ce;  
638 NP\_508841.1), *Saccharomyces cerevisiae* (cs; NP\_116614.1) and *Saccharomyces pombe* (sp;  
639 NP\_595618.1).

640 **(D)** The methyl-histidine containing loop in ACTA1 is a PTM hotspot. PTMs annotated in the  
641 PhosphoSitePlus database (v6.5.9.3) are shown. Modifications observed in mouse ACTA1 (star) and  
642 sites corresponding to disease associate mutations are indicated (red).

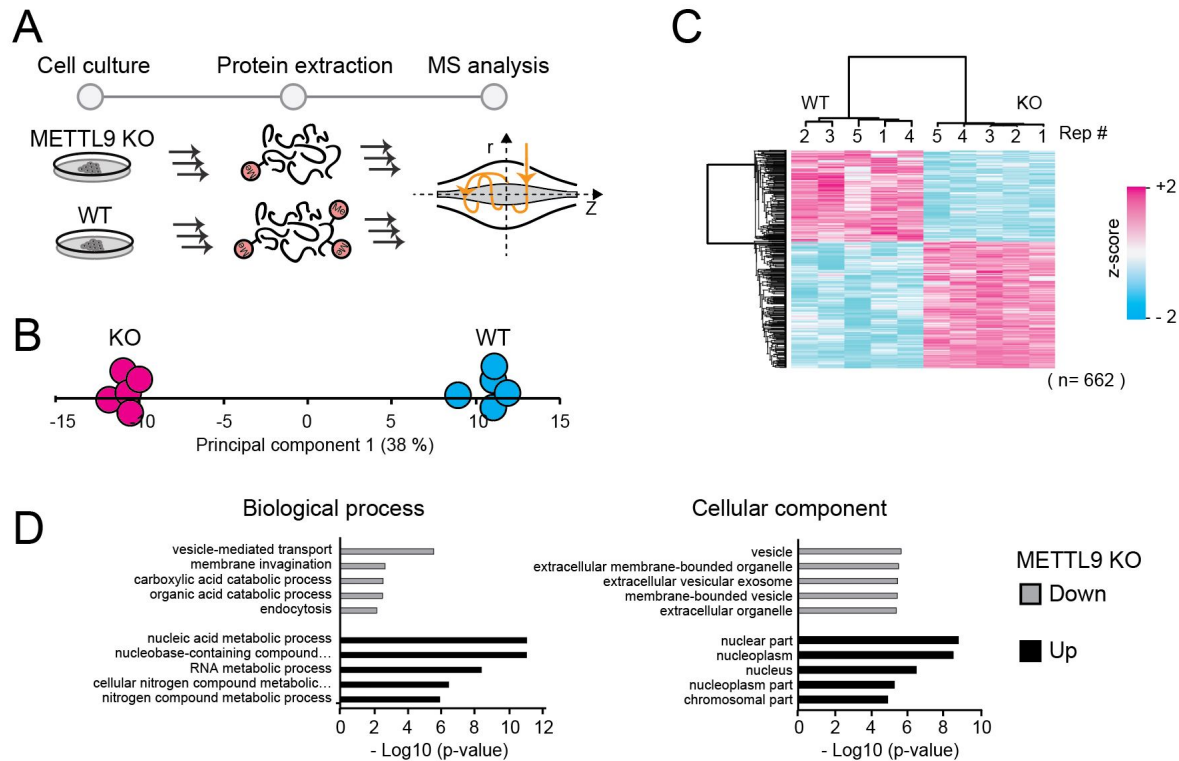

643

644 **Figure 6. Cellular effects of METTL9 knockout.**

645 (A) Workflow for proteomics characterization of METTL9 KO cells. Proteins were extracted from HAP-  
 646 1 wild type (WT) and METTL9 knockout (KO) cells and processed for label free quantitative mass  
 647 spectrometry.

648 (B) Principal component analysis. Separation of experimental conditions (WT and KO) and replicates  
 649 (n=5) in the first principal component is shown.

650 (C) Clustering analysis. Hierarchical cluster of z-scored LFQ intensities for proteins having a significant  
 651 difference in abundance (Student's T-test,  $P\text{-adj} < 0.05$ ; Benjamini-Hochberg FDR) between the WT  
 652 and KO condition.

653 (D) Gene ontology analysis. The top five ontologies within biological process and cellular component  
 654 are shown both for up- and down regulated proteins in METTL9 KO cells, relative to a WT control.

655 **SUPPLEMENTARY FIGURES**

656

**Supplementary Figure S1**

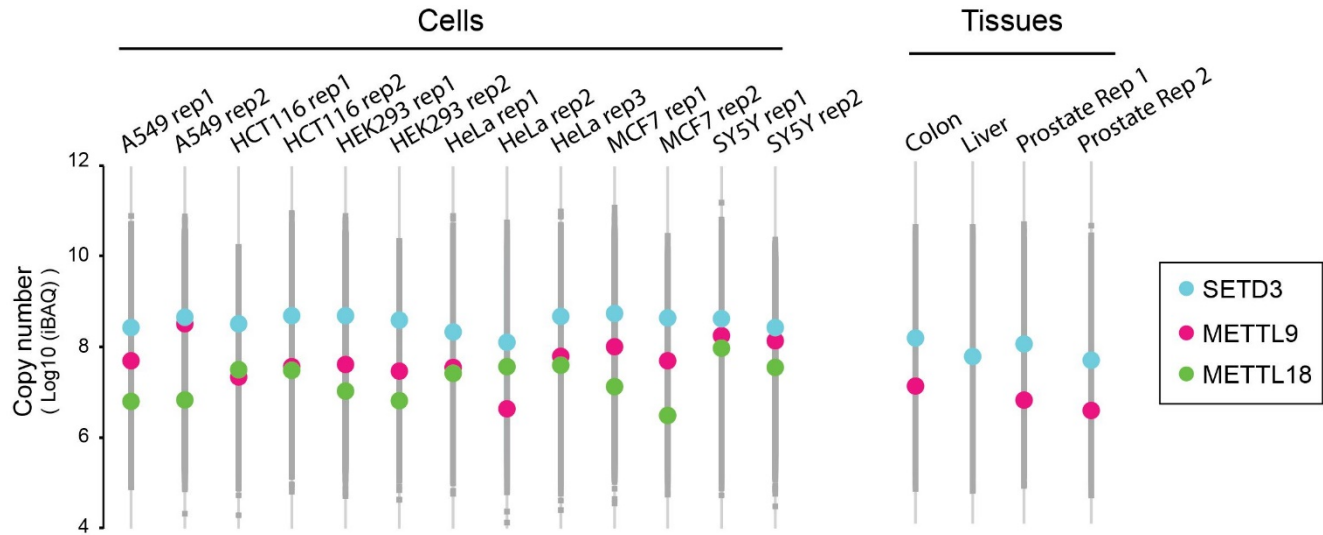

657

658

659 **Supplementary Figure S1. Expression of histidine methyltransferases in cells and tissues.**

660 Profile plot showing the cellular copy number (iBAQ value) for the established human histidine  
661 methyltransferase enzymes SETD3 and METTL9 as well as the candidate histidine methyltransferase  
662 METTL18.



## Supplementary Figure S2

**A**

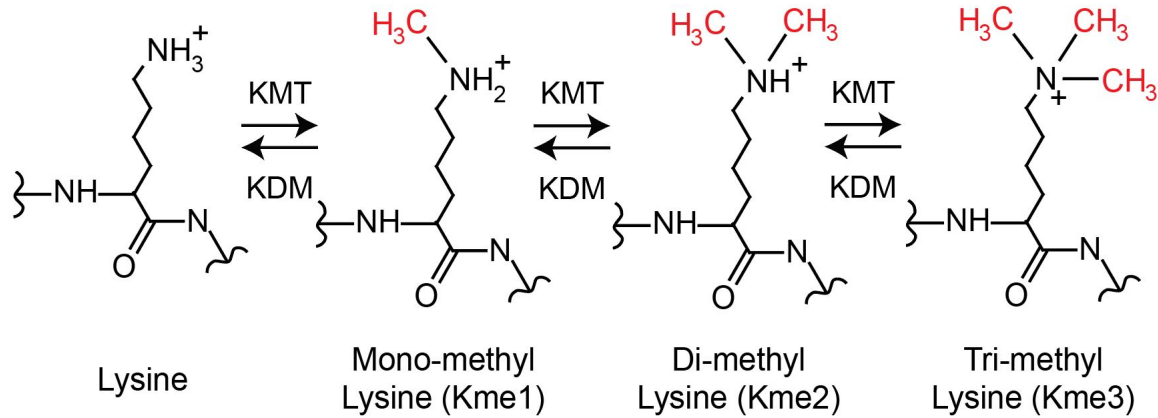

**B**

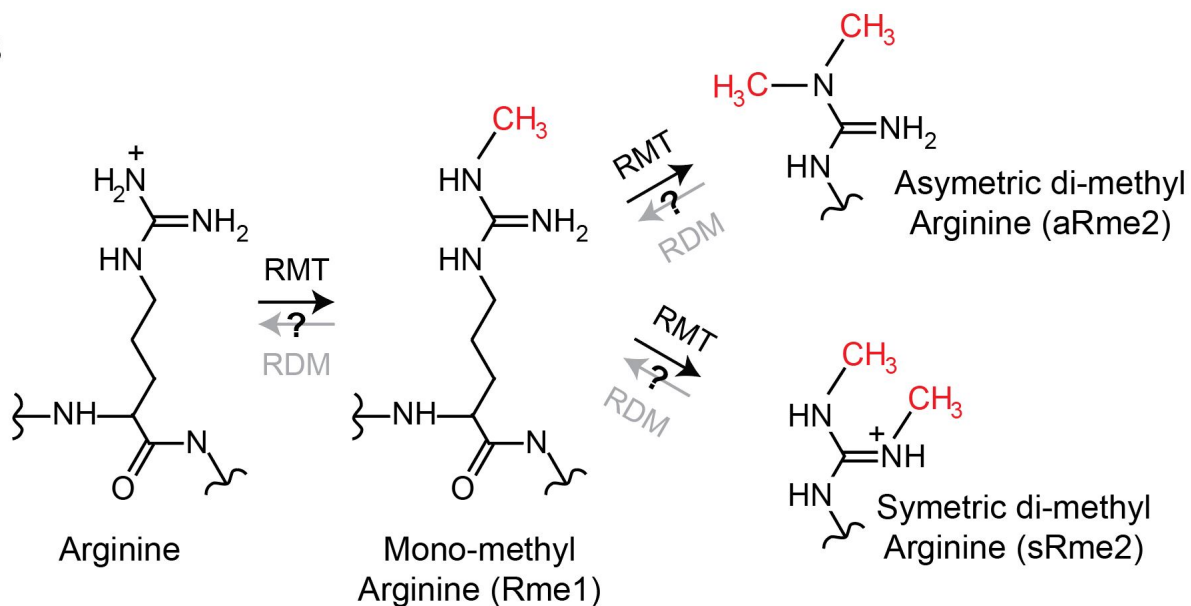

663

664 **Supplementary Figure S2. Biochemistry of lysine and arginine methylation.**

665 (A-B) The chemical structures and enzymology for (A) lysine methylation and (B) arginine methylation  
 666 are shown. The methylations are introduced by lysine methyltransferase (KMT) and arginine  
 667 methyltransferase (RMT) enzymes, respectively. Lysine methylation can be reversed by lysine  
 668 demethylases (KDM). It is hypothesized, but not yet established that arginine demethylase (RDM)  
 669 enzymes exist.

## Supplementary Figure S3

### A

|                 |                                                                                |      |
|-----------------|--------------------------------------------------------------------------------|------|
| ACTB (P60709)   | EAQSKRGILTLKYPIE <b>H</b> GIVTNWDDMEKIWHHTFYN-ELRVAPEEHPVLLTEAPLNPKAN          | -115 |
| ACTG1 (P63261)  | EAQSKRGILTLKYPIE <b>H</b> GIVTNWDDMEKIWHHTFYN-ELRVAPEEHPVLLTEAPLNPKAN          | -115 |
| ACTA1 (P68133)  | EAQSKRGILTLKYPIE <b>H</b> GIITNWDDMEKIWHHTFYN-ELRVAPEE <b>H</b> PTLLTEAPLNPKAN | -117 |
| ACTA2 (P62736)  | EAQSKRGILTLKYPIE <b>H</b> GIITNWDDMEKIWHHSFYN-ELRVAPEE <b>H</b> PTLLTEAPLNPKAN | -117 |
| ACTG2 (P63267)  | EAQSKRGILTLKYPIE <b>H</b> GIITNWDDMEKIWHHSFYN-ELRVAPEE <b>H</b> PTLLTEAPLNPKAN | -116 |
| ACTR1A (P61163) | KAEHRGLLSIRYPME <b>H</b> GIVKDWDMERIQYVYSKDQLQTFSEEHPVLLTEAPLNPRKN             | -120 |

### B

|                |                                |      |
|----------------|--------------------------------|------|
| APEX1 (P27695) | KVSYGIGDEE <b>H</b> DQEGRVIVAE | -161 |
| CPT2 (P23786)  | IIAKDGSTAV <b>H</b> FEHSWGDGVA | -379 |
| EXOS7 (Q15024) | VLHASLQSVV <b>H</b> KEESLGPKRQ | -285 |
| NP1L4 (Q99733) | -----MAD <b>H</b> SFSDGVPSDS   | -14  |
| RBM22 (Q9NW64) | CKRGEECPYR <b>H</b> EKPTDPDDPL | -193 |

670

671 **Supplementary Figure S3. Sequence alignments of core histidine methylome proteins.**

672 **(A)** Protein sequence alignment of human actin proteins. Sites of which methylation is supported in our  
673 analysis are indicated in bold.

674 **(B)** Protein sequence alignment of non-actin core histidine methylome proteins. Proteins shown are  
675 APEX1-H151 (Uniprot id P27695), CPT2-H369 (P23786), EXOS7-H275 (Q15024), NP1L4-H4  
676 (Q99733) and RBM22-H183 (Q9NW64). The histidine detected as methylated is highlighted in bold.

## Supplementary Figure S4

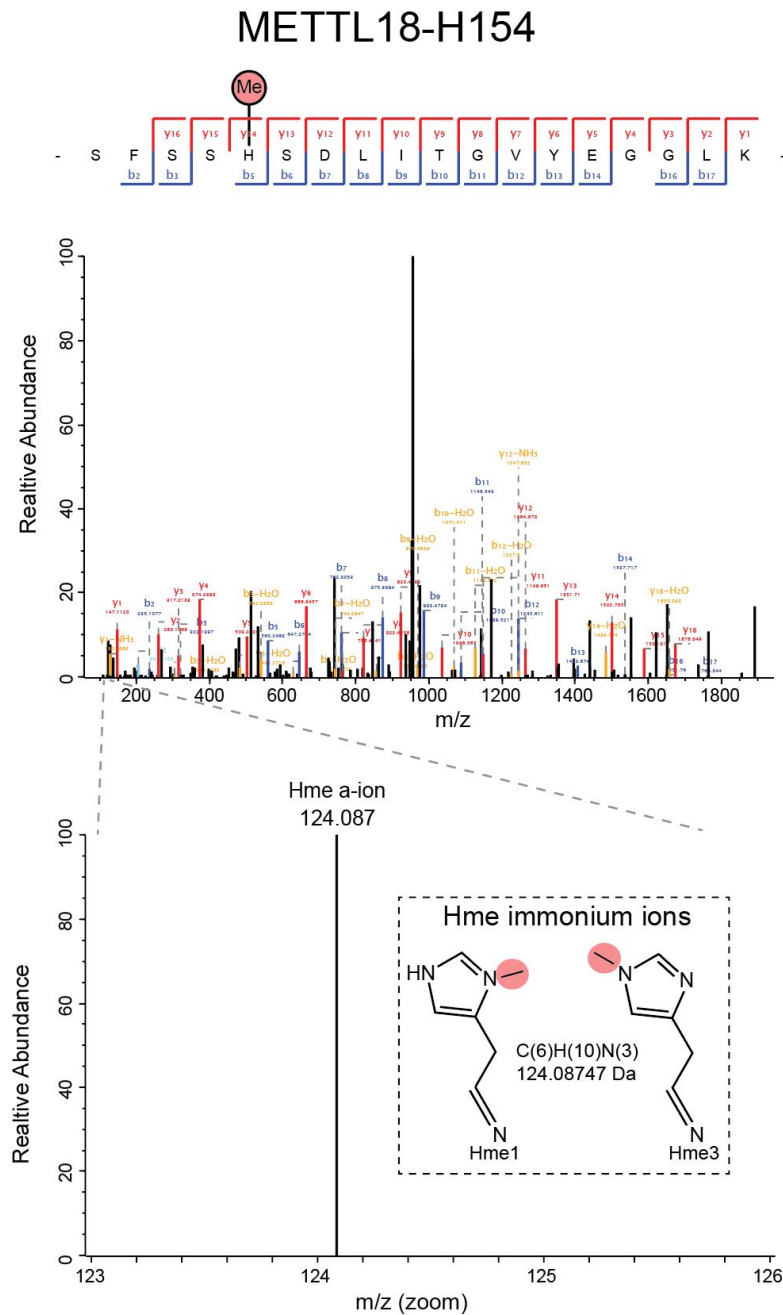

677

678 **Supplementary Figure S4. METTL18 is methylated at H154 in HeLa cells.**

679 Tandem mass spectrum demonstrating monomethylation of H154 in METTL18 is shown. The peptide

680 corresponds to residues S150-K168 in METTL18 (Uniprot id: O95568).

681

682

## Supplementary Figure S5

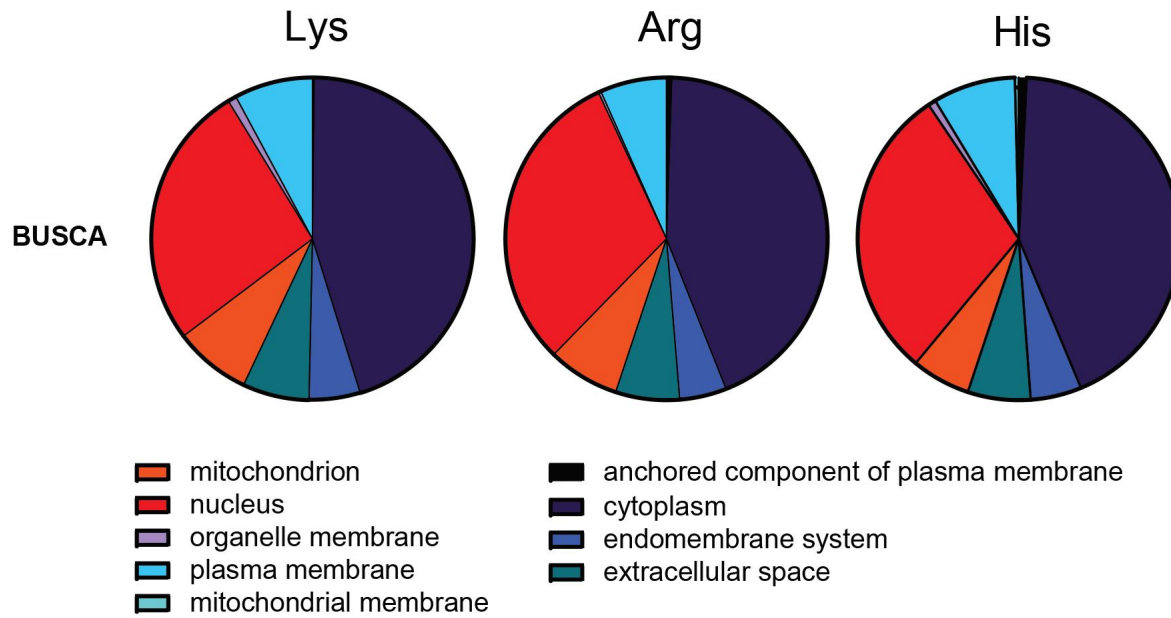

### Supplementary Figure S5. Methylated proteins are distributed throughout the cell.

The subcellular localization of proteins methylated in HeLa cells. Pie charts representing the relative predicted localization based on the BUSCA prediction<sup>19</sup>.

## Supplementary Figure S6

**A**

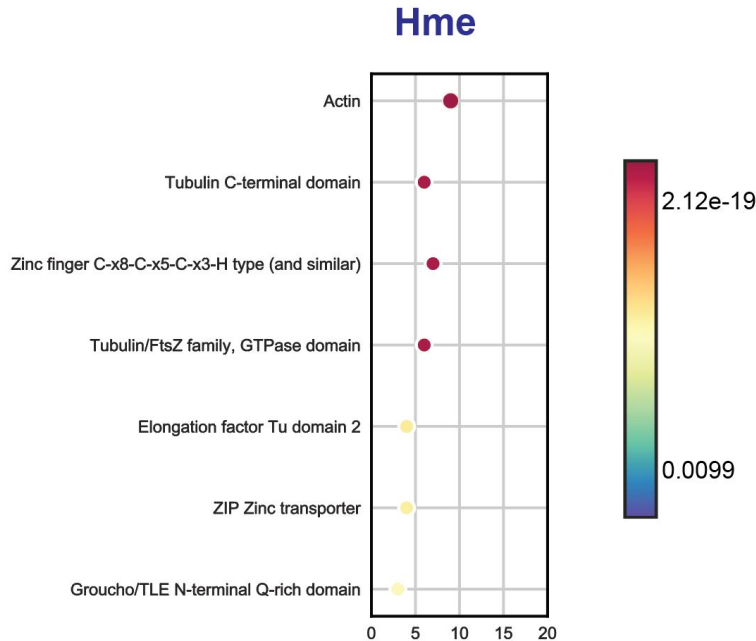

**B**

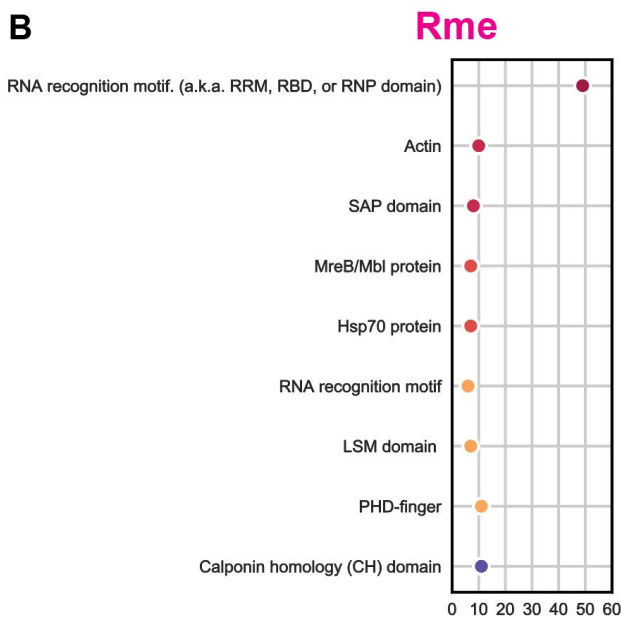

**C**

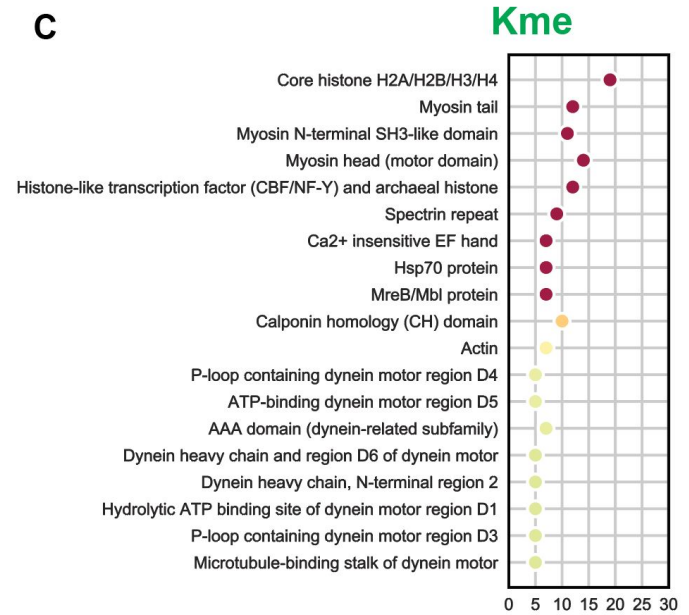

687

688 **Supplementary Figure S6. Domain enrichment analysis of proteins containing a methylation site.**

689 Functional enrichment analysis performed on methylated proteins based using the Pfam database,

690 categories considered significant (p-value < 0.01) were adjusted using the Benjamini-Hochberg method.

691 The total number of proteins having a significant enrichment in each category is shown on the x-axis.

## Supplementary Figure S7

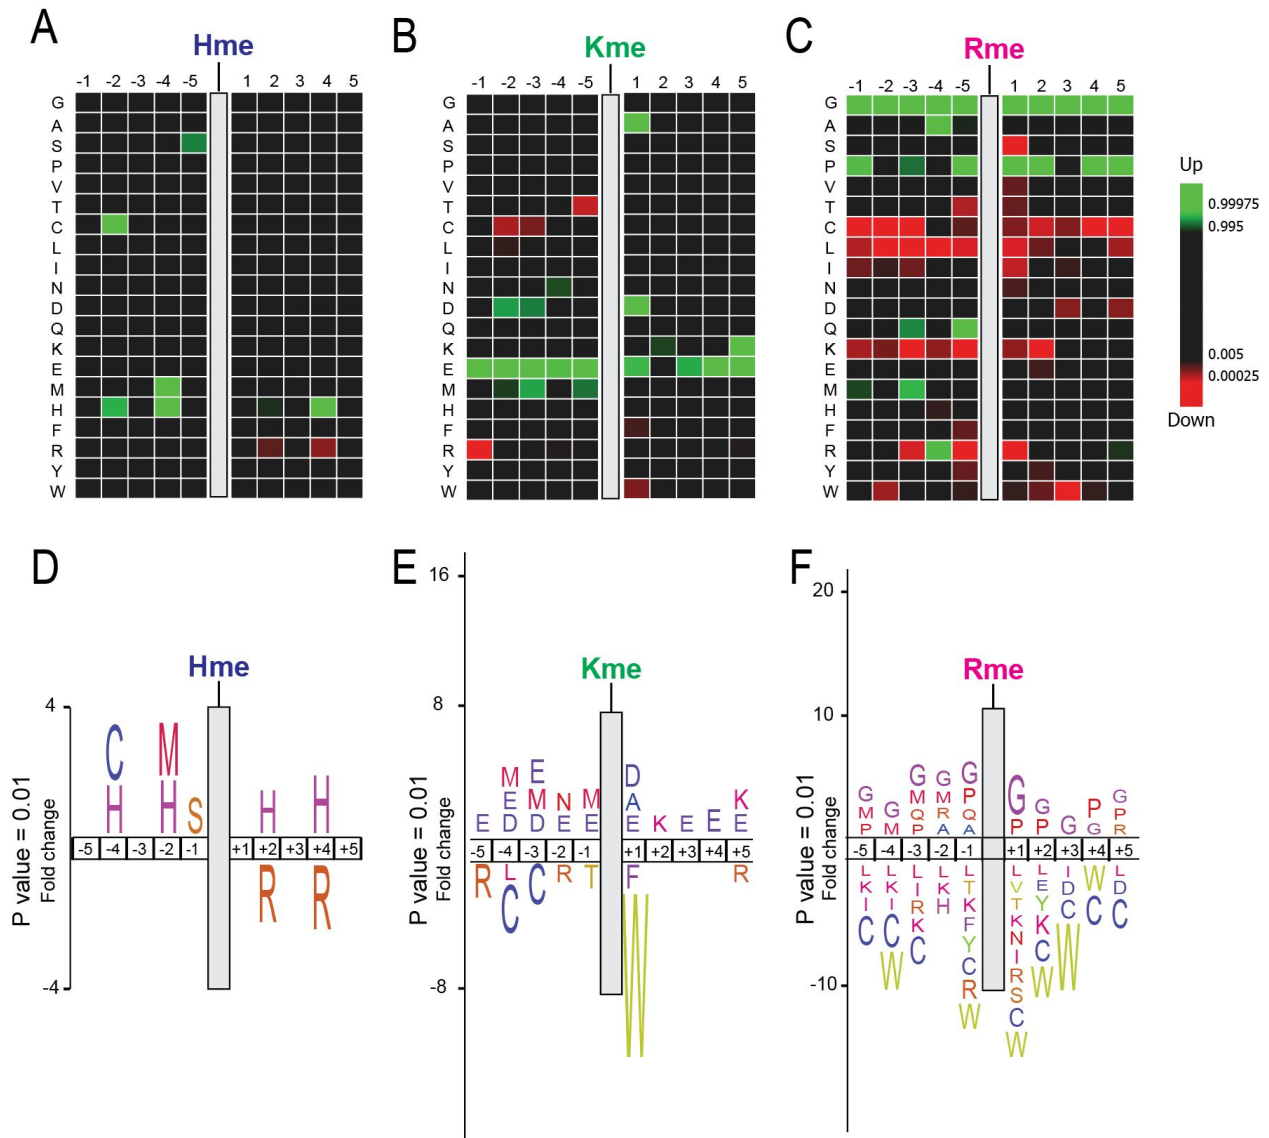

692

### 693 **Supplementary Figure S7. Sequence context of protein methylation events.**

694 **(A-C)** Methylome heat maps. Heat maps illustrating over- or under-representation of amino acids in  
 695 the 5 positions up- and down-stream of identified (A) Hme, (B) Kme, and (C) Rme sites are shown.  
 696 The enrichment is based on using the *H. Sapiens* precompiled Swiss-Prot composition as reference.  
 697 **(D-F)** Methylome sequence logos. Logo representations of the heat maps in (A-C) are shown.
